# Supplementary material for: Validation of a Unilateral Cleft Lip Surgical Outcomes Evaluation Scale for Surgeons and Laypersons
Source: PubMed Central journal article supplement — Plast Reconstr Surg Glob Open. 2017 Sep 13;5(9):e1472. doi: 10.1097/GOX.0000000000001472 (PMC5640349; doi:10.1097/gox.0000000000001472), 2017-09-13
Supplement: gox-5-e1472-s001.pdf [file gox-5-e1472-s001.pdf]

5a. Cupid's bow

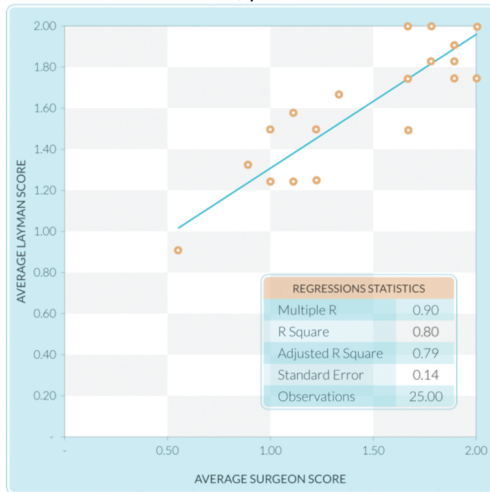

|              | COEFFICIENTS | STANDAR ERROR | t STAT | P VALUE | LOWER 95% | UPPER 95% |
|--------------|--------------|---------------|--------|---------|-----------|-----------|
| Intercept    | 0.66         | 0.11          | 6.13   | 0.00    | 0.44      | 0.88      |
| X Variable 1 | 0.65         | 0.07          | 9.65   | 0.00    | 0.51      | 0.79      |

5b. Lateral lip

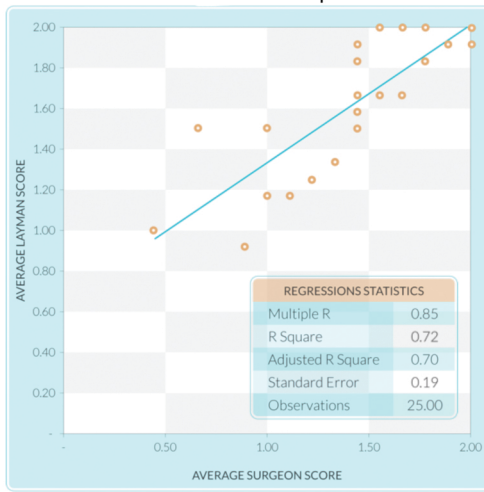

|              | COEFFICIENTS | STANDAR ERROR | t STAT | P VALUE | LOWER 95% | UPPER 95% |
|--------------|--------------|---------------|--------|---------|-----------|-----------|
| Intercept    | 0.66         | 0.14          | 4.84   | 0.00    | 0.38      | 0.94      |
| X Variable 1 | 0.68         | 0.09          | 7.61   | 0.00    | 0.49      | 0.86      |

5c. Nose

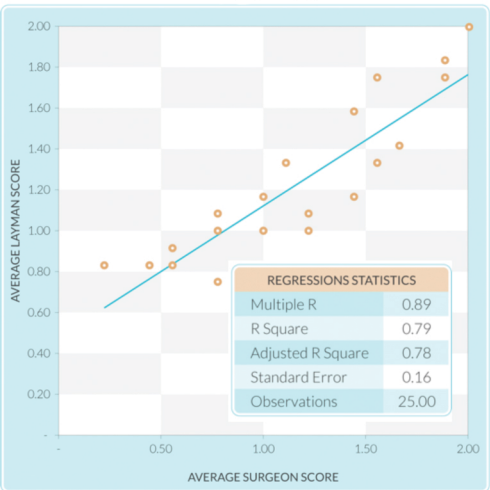

|              | COEFFICIENTS | STANDAR ERROR | t STAT | P VALUE | LOWER 95% | UPPER 95% |
|--------------|--------------|---------------|--------|---------|-----------|-----------|
| Intercept    | 0.48         | 0.09          | 5.59   | 0.00    | 0.30      | 0.66      |
| X Variable 1 | 0.64         | 0.07          | 9.22   | 0.00    | 0.50      | 0.79      |

5d. Free vermilion

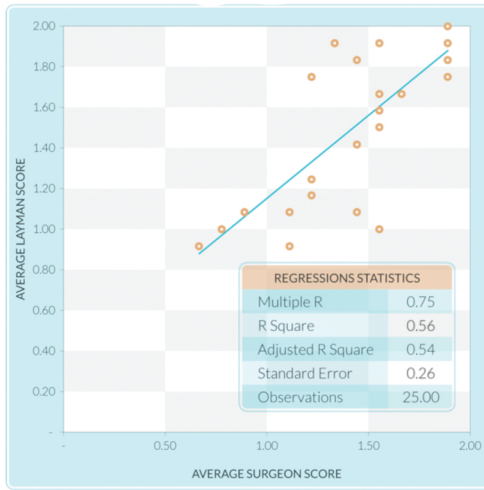

|              | COEFFICIENTS | STANDAR ERROR | t STAT | P VALUE | LOWER 95% | UPPER 95% |
|--------------|--------------|---------------|--------|---------|-----------|-----------|
| Intercept    | 0.33         | 0.22          | 1.49   | 0.15    | (0.13)    | 0.80      |
| X Variable 1 | 0.82         | 0.15          | 5.40   | 0.00    | 0.51      | 1.13      |
