# Supplementary material for: Validation of a Unilateral Cleft Lip Surgical Outcomes Evaluation Scale for Surgeons and Laypersons
Source: PubMed Central journal article supplement — Plast Reconstr Surg Glob Open. 2017 Sep 13;5(9):e1472. doi: 10.1097/GOX.0000000000001472 (PMC5640349; doi:10.1097/gox.0000000000001472), 2017-09-13
Supplement: gox-5-e1472-s002.pdf [file gox-5-e1472-s002.pdf]

7a. Cupid's bow

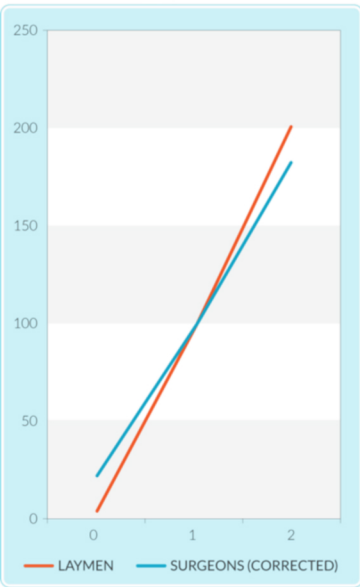

| SCORE | SURGEONS | LAYMEN | SURGEONS (CORRECTED) |
|-------|----------|--------|----------------------|
| 0     | 16       | 3      | 21.33                |
| 1     | 72       | 96     | 96.00                |
| 2     | 137      | 201    | 182.67               |

7b. Lateral lip

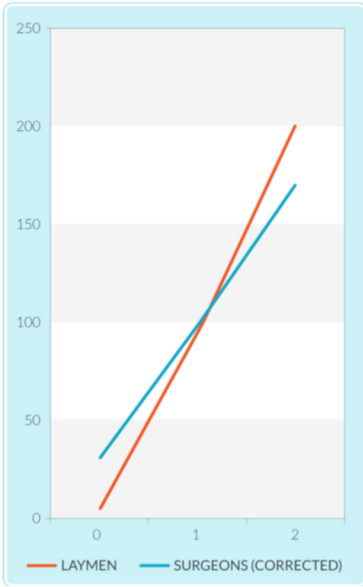

| SCORE | SURGEONS | LAYMEN | SURGEONS (CORRECTED) |
|-------|----------|--------|----------------------|
| 0     | 23       | 5      | 30.67                |
| 1     | 74       | 95     | 98.67                |
| 2     | 128      | 200    | 170.67               |

7c. Nose

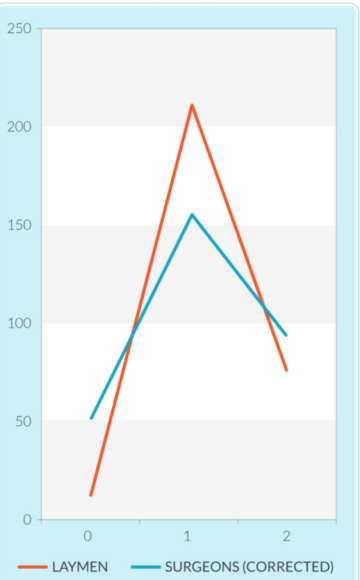

| SCORE | SURGEONS | LAYMEN | SURGEONS (CORRECTED) |
|-------|----------|--------|----------------------|
| 0     | 38       | 12     | 50.67                |
| 1     | 117      | 212    | 156.00               |
| 2     | 70       | 76     | 93.33                |

7d. Free vermillion

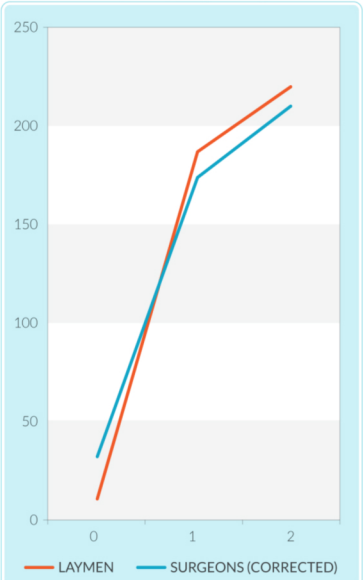

| SCORE | SURGEONS | LAYMEN | SURGEONS (CORRECTED) |
|-------|----------|--------|----------------------|
| 0     | 17       | 7      | 22.67                |
| 1     | 94       | 134    | 125.33               |
| 2     | 114      | 159    | 152                  |
